# Supplementary material for: Genome-wide characterization of WRKYs and function of SpWRKY40 and SpWRKY50 in Sesuvium portulacastrum
Source: Research Square preprint supplement (doi:10.21203/rs.3.rs-7513928/v1), 2025-10-20
Supplement: Supplementary file 1 [file 33dc220584d94c5c9607f379.xlsx]

## Sheet: leaf
Gene	CK Leaves1	CK Leaves2	CK Leaves3	7 Leaves1	7 Leaves2	7 Leaves3	14 Leaves1	14 Leaves2	14 Leaves3	21 Leaves1	21 Leaves2	21 Leaves3	CK Root1	CK Root2	CK Root3	7 Root1	7 Root2	7 Root3	14 Root1	14 Root2	14 Root3	21 Root1	21 Root2	21 Root3
SpWRKY1	1	3	8	1	2	0	1	1	0	5.82	0	1	1137.49	980.38	1259.71	1074.36	1037.63	986.02	706.04	720.7	679.4	867.54	755.79	484.6
SpWRKY2	0	0	0	0	1	0	0	0	0	0	1	0	2	2	1	1	4	2	2	0	0	1	2	0
SpWRKY3	202.19	171.59	166.68	143.02	136	109	196.47	224.75	243.14	205.12	196.71	232.92	190.32	162.32	129.77	162.1	149.51	152.74	99.11	98.35	117.3	171.49	202.5	194.32
SpWRKY4	1	0	0	2	1	3	3	3	3	4	3	3	2	1	0	1.1	0	2	0	0	1	0	0	0
SpWRKY5	1	3	7	1	0	0	1	3	2	0	2	4	3	3	2	16	16	15	62.3	55.99	55	33	51	62.07
SpWRKY6	0	0	0	0	0	1	0	0	1	0	0	0	7	15	10	18	23	26	6	6	9	13	8	11
SpWRKY7	525.6	311.92	669.76	322.02	381.15	363	866.79	811.33	821.49	288.49	320.27	280.14	65.43	89.05	82.02	392.19	348.29	393.82	781.26	820.35	804.55	445.92	520.71	505.75
SpWRKY8	5.52	41.75	24.28	144.33	110.82	122.36	27.65	31	24.08	31.29	28.96	22	26	19	36	12.71	19	17	15.6	5	12	8	12	4
SpWRKY9	2026.49	2218.79	2095.63	1888.71	1877.01	2029.01	1604.24	1699.75	1628.89	1774.25	1795.36	1804.5	1545.96	1652.53	1540.11	1856.43	1871.79	1863.44	1361.75	1337.41	1363.39	1321.36	1388.45	1430.36
SpWRKY10	354.85	426.65	570.03	204.35	236	210.98	281.52	254.4	269.92	206.49	191.23	213.4	195.39	203.63	206.95	201.98	182.22	195.27	248.42	248.52	254.66	234.54	258.61	237.57
SpWRKY11	21	16	32.17	11	17	22.02	8.02	14	13	15.01	9.03	10.2	86	75	97.94	137	105.09	105	142	138	153	172	181	210.14
SpWRKY12	179	398	259	351	375	334.08	362	318	330.89	370	357.49	337	253.41	254	306	435.2	411	404.3	353	374	390	374.45	511.48	408.8
SpWRKY13	55.2	149.13	123.21	77.64	109.64	79.45	67.95	72.21	68.59	51.05	59.32	63.15	157.31	173.04	159.64	346.57	344.54	316.68	313.68	303.25	296.05	284.9	347.26	414.94
SpWRKY14	76.32	81.02	94.25	74.22	89.66	96.39	76.38	74.22	67.93	70.13	67.93	95.46	470.15	547.83	553.65	611.78	619.25	607.3	656.87	675.66	602.62	377.65	412.17	407.11
SpWRKY15	566	528	738	845	892.74	857.75	889.78	910.44	895.43	640	669.97	715	552.79	630	721	992.44	933	997	1223.75	1354.75	1372.04	1306	987.27	1013.49
SpWRKY16	914.61	1160.98	1402.23	801.39	780.61	804.65	1355.57	1359.09	1393.65	819.06	764.34	788.66	623.89	625	626.74	633.26	611.04	634.17	940.61	895.19	912.09	871.3	847.22	873.32
SpWRKY17	125.64	166.8	170.38	109.01	100.34	135.85	121.91	115.46	118.54	155	139.98	163	415.71	372.1	453.45	593.05	526.7	514.17	639.72	644.84	660.33	633.83	736.83	809.2
SpWRKY18	64.11	116.99	80.02	154.08	142	138.05	107	90	104.98	123	119	144.43	265	265.21	292.99	399	369	375.51	249	265.01	268.08	257	231.3	208.99
SpWRKY19	1	0	0	0	0	0	0	0	0	0	0	0	149.32	164.5	149.12	123.62	108.92	95.1	123.03	128.41	94.84	112.87	103.27	38.03
SpWRKY20	50	71.06	17	47	40.61	50.61	58.52	68.87	51.69	75.08	88.66	79.48	24.16	12.27	19.12	81.37	66.98	60.76	56.6	38.76	46.69	121.97	100.5	26.37
SpWRKY21	9.37	12.2	27.37	3.71	1.15	8.87	8.48	4.36	6.14	1.18	4.9	3.5	95.19	93.93	115.21	63.96	79.88	46.6	51.09	62.45	59.33	45.61	57.52	21.88
SpWRKY22	57	70.25	116.31	62.1	51.58	73.67	56.48	50	53	34.23	45.01	40	13	7	14	5.29	5	3	10.4	6	4	5	10	4
SpWRKY23	0	0	0	0	0	0	0	0	0	1	0	0	154	168.22	169	110	77	86.38	99	105	108.44	117	87	50
SpWRKY24	74.23	139.01	125.85	210.9	224.91	224.2	255.48	276.55	251.93	209.43	192.88	189.93	123.29	118.07	124.57	103.26	113.14	119.46	171.26	163.99	175.04	115.78	87.29	112.5
SpWRKY25	129.48	155	205.41	122.57	141.6	133.97	112.87	95	120.92	53.49	67.04	44	23	25	22	12	11	9	20	17	18	21	12	11
SpWRKY26	273.18	369.84	290.83	485.88	450.52	448.88	279.17	291.96	248.36	284.03	289.58	271.8	276.31	288.07	341.32	643.19	536.53	564.21	462.57	487.95	457.95	432.67	435.69	426.6
SpWRKY27	10	19.94	4	12	14.39	12.29	26.48	15.13	34.31	26.92	26.34	40.52	181.84	180.73	203.88	203.63	201.73	185.24	190.4	163.24	170.31	314.03	286.5	115.63
SpWRKY28	2552.02	2039.31	2714.99	2316.69	2318.9	2420.22	3221.49	3329.08	3208.15	2030.46	2064.99	2139.37	2121.34	2296.53	2416.82	2431.65	2218.93	2188.65	2685.81	2664.42	2772.55	2497.02	2573.75	2188.04
SpWRKY29	203.78	207.57	280.43	269.49	271.92	248.12	202.18	233.13	208.99	136.88	141.64	132.58	212.16	250.13	252.26	580.8	521.19	520.66	420.87	450.83	484.56	405.99	416.06	354.92
SpWRKY30	212.03	241.98	314.57	121.61	127.66	126.74	149.79	158.02	176.07	166.68	151.36	150.43	8	7.13	8.36	278.01	247.62	259.08	216.28	233.31	211.16	242.49	430.24	266.83
SpWRKY31	117	95	144.35	50	60	50.69	68.05	91	66	55.04	78	62.99	67	62.25	76	183	176.39	325.67	966.41	962.61	952.57	992.24	1233.36	1362.08
SpWRKY32	19	30.01	34.87	13	9	17	33.95	33.98	31	51.4	35	43.01	18	18.75	19	74.78	75.13	206.32	916.79	875.23	899.16	933.22	1663.5	1378.62
SpWRKY33	153.41	286.98	254.7	234.93	255.73	258.49	241.13	280	239.96	226.56	216.61	204.36	194.27	209.76	206.31	288.86	240.59	277.38	414.67	418.21	432.45	288.44	293.71	302.93
SpWRKY34	105.55	98.72	225.55	57.29	76.85	70.09	39.8	40.64	52.76	49.76	46.08	35.5	168.95	177.09	164.06	174.37	193.22	185.6	152.92	167.38	145.66	172.25	188.65	149.36
SpWRKY35	199.83	202.84	357.71	223.35	179.43	169.95	142.57	143.69	145.52	118.46	109.18	113.84	684.58	684.44	769.96	867.04	874.42	870.59	700.93	695.36	739.74	761	573.56	386.25
SpWRKY36	36	37.54	55.75	13.72	22	18.67	28.43	27	26.31	32.35	33	39.62	14	23.01	16.88	151.73	124.08	175.73	314.17	345.44	286.91	251.17	276.39	285.3
SpWRKY37	560.9	899.49	680.99	802.19	842.16	782.59	661.79	534.04	579.8	705.39	690.46	681	806.21	683.88	668.82	1182.77	1113.1	1204.68	1118.24	1173.37	1060.65	1061.26	888.92	1045.83
SpWRKY38	389.01	680.05	537.44	542.62	594.58	564.97	529.13	512.7	565.8	556.62	611.21	543.04	943.69	1046.61	916.57	1221.19	1199.7	1082.56	967.93	971.58	946.34	933.74	960.72	960.18
SpWRKY39	748.58	1167.43	1292.48	575.53	547.37	507.63	774.66	773.96	702.68	769.48	664.36	668.98	664.39	576.28	530.02	632.01	634.96	683.44	998.9	972.97	934.52	742.22	826.92	923.58
SpWRKY40	2144.98	2494.29	2497.13	2568.33	2552.54	2511.5	4736.02	4303.17	4553.87	2523.03	2515.74	2436.18	939.29	988.74	965.01	2228	2222.39	2267.67	3097.68	2963.58	3005.17	2389.1	2162.9	1955.05
SpWRKY41	39.17	63.16	136.29	35.65	59.57	36.05	45.43	27.31	30.48	37.38	33.82	40.16	602.17	609.56	693.04	805.96	846.36	844.41	685.96	698.01	707.26	666.43	587.96	373.75
SpWRKY42	55	46	103	41	46	39.85	51.47	33.88	31	32	34	16	15.13	30	34	54	42	43	48.82	42	59.01	55.82	40	54
SpWRKY43	208.23	209.43	296.09	184.65	186.08	197.88	188.82	191.87	162.01	106.12	115.36	108.41	192.84	216.87	228.81	407.2	338.81	349.34	307.46	355.98	317.44	275.01	315.94	269.51
SpWRKY44	522.43	748.94	655.67	422.61	423.87	400.87	423.76	419.06	421.18	459.54	501.03	387.98	970.3	674.55	780.56	1074.19	957.76	993.18	996.78	1044.08	1066.84	1081.57	1191.88	1119.3
SpWRKY45	142	153	228.89	65	63	76.15	77.53	95.12	63	56	72	64	78.87	98	106	82	83	78	132.18	123	116.99	102.18	118	115
SpWRKY46	0	1	4	1	1	0	0	0	0	1	0	1	367	393.05	405	397.3	426.26	332.25	222.97	239.31	251	313.28	300.27	164
SpWRKY47	2.08	2.08	4.08	1	1	1.04	3.72	2	2.1	2.06	1.03	0	140.86	142.98	171.73	82.67	54.9	61.8	66	72.17	78.01	67.14	73.82	33.76
SpWRKY48	3	21	14	5	0	1	9	11	10	5	7	11	5	7	2	11	14	15	3	5	4	10	5	2
SpWRKY49	248.37	355.05	277.87	428.74	446.5	437.48	387.31	390.51	343.02	378.2	327.51	310.68	449.76	449.07	491	491.64	480.81	510.93	469.82	492.6	485.98	484.59	509.35	478.76
SpWRKY50	2001.21	1369.94	1935.77	1229.95	1356.18	1353.17	2362.58	2358.79	2428.48	1090.88	1039.62	1086.52	75.99	73.77	70.7	738.36	645.24	825.35	1607.45	1582.01	1651.3	1637.9	2409.71	2142.47
SpWRKY51	4325	4867	4925.95	4035	4153.61	4165	7665	7337.61	7740.63	4305	4217.61	3988	1559	1573	1659	4430.65	4418	4683.66	7174.67	6956.69	6999	5727.69	5286.84	5136
SpWRKY52	39	38	17	31	32	23.11	87	95	83	64	74	87	156	139	157	243	234.3	225	353	388	359	511	346	221
SpWRKY53	58.11	61.13	95.3	71.72	60.17	66.14	186.78	219.49	166.06	87.83	84.69	83.17	699	636.22	684.88	560.15	508.74	478.13	631.02	638.59	553.54	359.65	297.8	271.63
SpWRKY54	39.18	43.2	40.17	15.99	28.17	26.15	38	31	39	25	25	26.75	180.29	196.24	192.48	382.1	440.56	455.6	739.13	782.87	764.99	567.38	713.6	812.42
SpWRKY55	5	25	22.3	0	2	1	2	4	2	2.12	3	3	13.26	33	23	11	13	14	18	6	10	24	12	6
SpWRKY56	4256.63	4276.31	3724.5	4336.23	4309.39	4445.01	3000.46	3299.4	3231.76	3471.11	3372.96	3713.85	2745.19	2322.39	2436.16	5103.92	4707.32	4791.82	2692.55	2608.91	2761.25	2952.02	3010.41	3274.88
SpWRKY57	1851.68	1882.41	3146.17	2177.68	2240.87	2232.86	3036.39	3103.94	2933.44	1594.62	1667.7	1667.54	265.13	356.98	423.49	769.34	739.23	842.55	1314.47	1354.59	1261.13	905.1	1064.76	886.95
SpWRKY58	5	2	1	2	5	9	5.59	4	2	6	6	3	5	1	6	11.9	21.01	10	14	5	8.66	4	8	8
SpWRKY59	29	41.46	54.25	16.28	12	24	27.57	26	28.69	26.65	35	16.38	10	9.99	11	39.64	48.92	81.27	173.53	209.56	187.09	123.83	122.61	165.63
SpWRKY60	241.63	335.95	263.13	483.26	488.5	514.52	392.69	376.49	379.98	374.8	399.49	426.32	860.24	783.93	825	815.36	821.19	819.07	633.18	596.4	624.02	587.41	653.65	560.24
SpWRKY61	3	1	0	1	5	2	1.41	4	3	7	5	3	5	3	10	3	4.99	7	3	2	4.34	4	7	7
SpWRKY62	509	525	763	921	881.99	819	753	776	819	536	542	510	865	1036.57	1136	1517	1449	1600	1819.63	1967	1979	1963.06	1614	1366.65
SpWRKY63	41	73	54.97	147.92	145	154.95	71	90	93.03	98	112	114.03	239.08	307.78	314.12	406.93	385.99	367.26	295.08	296.95	266.23	310.03	315.01	269.17
SpWRKY64	88.04	176.56	140.2	104.59	126.21	106.96	181.65	187.55	188.2	187.74	191.31	182.47	173.65	151.47	171.2	235.16	193.06	232.1	199.41	228.04	186.86	226.09	245.07	218.12
SpWRKY65	2505.39	2603.31	4035.46	2632.69	2678.35	2624.37	4003.63	3821.76	3943.05	1928.72	2112.68	1921.02	399.28	495.32	563.22	943.99	967.67	1048.45	1279.61	1287.48	1260.17	1035.1	1169.52	927.15
SpWRKY66	116	100	188	69	58	55	51	69	69	39.16	48	43	510.25	513	595	653	681.22	676	372.11	410.63	391	371.57	351.49	219
SpWRKY67	521.99	574	660.47	409.85	417	414	416	395	426	301	300	284.01	234	289	352.93	872	837	815	785.67	825.19	857	650	752	807.58
SpWRKY68	584.67	885.57	696.34	512.2	507.96	503.54	542.45	499.9	497.02	606.07	616.51	570.02	882.48	757.57	823.62	1094.03	1081.15	1101.13	1045.98	1074.55	1062.51	1180.17	1167.2	1290.88

## Sheet: root
ID	Col-Root1	Col-Root2	Col-Root3	7dpi-Root1	7dpi-Root2	7dpi-Root3	14dpi-Root1	14dpi-Root2	14dpi-Root3	21dpi-Root1	21dpi-Root2	21dpi-Root3
SpWRKY1	1137.49	980.38	1259.71	1074.36	1037.63	986.02	706.04	720.7	679.4	867.54	755.79	484.6
SpWRKY2	2	2	1	1	4	2	2	0	0	1	2	0
SpWRKY3	190.32	162.32	129.77	162.1	149.51	152.74	99.11	98.35	117.3	171.49	202.5	194.32
SpWRKY4	2	1	0	1.1	0	2	0	0	1	0	0	0
SpWRKY5	3	3	2	16	16	15	62.3	55.99	55	33	51	62.07
SpWRKY6	7	15	10	18	23	26	6	6	9	13	8	11
SpWRKY7	65.43	89.05	82.02	392.19	348.29	393.82	781.26	820.35	804.55	445.92	520.71	505.75
SpWRKY8	26	19	36	12.71	19	17	15.6	5	12	8	12	4
SpWRKY9	1545.96	1652.53	1540.11	1856.43	1871.79	1863.44	1361.75	1337.41	1363.39	1321.36	1388.45	1430.36
SpWRKY10	195.39	203.63	206.95	201.98	182.22	195.27	248.42	248.52	254.66	234.54	258.61	237.57
SpWRKY11	86	75	97.94	137	105.09	105	142	138	153	172	181	210.14
SpWRKY12	253.41	254	306	435.2	411	404.3	353	374	390	374.45	511.48	408.8
SpWRKY13	157.31	173.04	159.64	346.57	344.54	316.68	313.68	303.25	296.05	284.9	347.26	414.94
SpWRKY14	470.15	547.83	553.65	611.78	619.25	607.3	656.87	675.66	602.62	377.65	412.17	407.11
SpWRKY15	552.79	630	721	992.44	933	997	1223.75	1354.75	1372.04	1306	987.27	1013.49
SpWRKY16	623.89	625	626.74	633.26	611.04	634.17	940.61	895.19	912.09	871.3	847.22	873.32
SpWRKY17	415.71	372.1	453.45	593.05	526.7	514.17	639.72	644.84	660.33	633.83	736.83	809.2
SpWRKY18	265	265.21	292.99	399	369	375.51	249	265.01	268.08	257	231.3	208.99
SpWRKY19	149.32	164.5	149.12	123.62	108.92	95.1	123.03	128.41	94.84	112.87	103.27	38.03
SpWRKY20	24.16	12.27	19.12	81.37	66.98	60.76	56.6	38.76	46.69	121.97	100.5	26.37
SpWRKY21	95.19	93.93	115.21	63.96	79.88	46.6	51.09	62.45	59.33	45.61	57.52	21.88
SpWRKY22	13	7	14	5.29	5	3	10.4	6	4	5	10	4
SpWRKY23	154	168.22	169	110	77	86.38	99	105	108.44	117	87	50
SpWRKY24	123.29	118.07	124.57	103.26	113.14	119.46	171.26	163.99	175.04	115.78	87.29	112.5
SpWRKY25	23	25	22	12	11	9	20	17	18	21	12	11
SpWRKY26	276.31	288.07	341.32	643.19	536.53	564.21	462.57	487.95	457.95	432.67	435.69	426.6
SpWRKY27	181.84	180.73	203.88	203.63	201.73	185.24	190.4	163.24	170.31	314.03	286.5	115.63
SpWRKY28	2121.34	2296.53	2416.82	2431.65	2218.93	2188.65	2685.81	2664.42	2772.55	2497.02	2573.75	2188.04
SpWRKY29	212.16	250.13	252.26	580.8	521.19	520.66	420.87	450.83	484.56	405.99	416.06	354.92
SpWRKY30	8	7.13	8.36	278.01	247.62	259.08	216.28	233.31	211.16	242.49	430.24	266.83
SpWRKY31	67	62.25	76	183	176.39	325.67	966.41	962.61	952.57	992.24	1233.36	1362.08
SpWRKY32	18	18.75	19	74.78	75.13	206.32	916.79	875.23	899.16	933.22	1663.5	1378.62
SpWRKY33	194.27	209.76	206.31	288.86	240.59	277.38	414.67	418.21	432.45	288.44	293.71	302.93
SpWRKY34	168.95	177.09	164.06	174.37	193.22	185.6	152.92	167.38	145.66	172.25	188.65	149.36
SpWRKY35	684.58	684.44	769.96	867.04	874.42	870.59	700.93	695.36	739.74	761	573.56	386.25
SpWRKY36	14	23.01	16.88	151.73	124.08	175.73	314.17	345.44	286.91	251.17	276.39	285.3
SpWRKY37	806.21	683.88	668.82	1182.77	1113.1	1204.68	1118.24	1173.37	1060.65	1061.26	888.92	1045.83
SpWRKY38	943.69	1046.61	916.57	1221.19	1199.7	1082.56	967.93	971.58	946.34	933.74	960.72	960.18
SpWRKY39	664.39	576.28	530.02	632.01	634.96	683.44	998.9	972.97	934.52	742.22	826.92	923.58
SpWRKY40	939.29	988.74	965.01	2228	2222.39	2267.67	3097.68	2963.58	3005.17	2389.1	2162.9	1955.05
SpWRKY41	602.17	609.56	693.04	805.96	846.36	844.41	685.96	698.01	707.26	666.43	587.96	373.75
SpWRKY42	15.13	30	34	54	42	43	48.82	42	59.01	55.82	40	54
SpWRKY43	192.84	216.87	228.81	407.2	338.81	349.34	307.46	355.98	317.44	275.01	315.94	269.51
SpWRKY44	970.3	674.55	780.56	1074.19	957.76	993.18	996.78	1044.08	1066.84	1081.57	1191.88	1119.3
SpWRKY45	78.87	98	106	82	83	78	132.18	123	116.99	102.18	118	115
SpWRKY46	367	393.05	405	397.3	426.26	332.25	222.97	239.31	251	313.28	300.27	164
SpWRKY47	140.86	142.98	171.73	82.67	54.9	61.8	66	72.17	78.01	67.14	73.82	33.76
SpWRKY48	5	7	2	11	14	15	3	5	4	10	5	2
SpWRKY49	449.76	449.07	491	491.64	480.81	510.93	469.82	492.6	485.98	484.59	509.35	478.76
SpWRKY50	75.99	73.77	70.7	738.36	645.24	825.35	1607.45	1582.01	1651.3	1637.9	2409.71	2142.47
SpWRKY51	1559	1573	1659	4430.65	4418	4683.66	7174.67	6956.69	6999	5727.69	5286.84	5136
SpWRKY52	156	139	157	243	234.3	225	353	388	359	511	346	221
SpWRKY53	699	636.22	684.88	560.15	508.74	478.13	631.02	638.59	553.54	359.65	297.8	271.63
SpWRKY54	180.29	196.24	192.48	382.1	440.56	455.6	739.13	782.87	764.99	567.38	713.6	812.42
SpWRKY55	13.26	33	23	11	13	14	18	6	10	24	12	6
SpWRKY56	2745.19	2322.39	2436.16	5103.92	4707.32	4791.82	2692.55	2608.91	2761.25	2952.02	3010.41	3274.88
SpWRKY57	265.13	356.98	423.49	769.34	739.23	842.55	1314.47	1354.59	1261.13	905.1	1064.76	886.95
SpWRKY58	5	1	6	11.9	21.01	10	14	5	8.66	4	8	8
SpWRKY59	10	9.99	11	39.64	48.92	81.27	173.53	209.56	187.09	123.83	122.61	165.63
SpWRKY60	860.24	783.93	825	815.36	821.19	819.07	633.18	596.4	624.02	587.41	653.65	560.24
SpWRKY61	5	3	10	3	4.99	7	3	2	4.34	4	7	7
SpWRKY62	865	1036.57	1136	1517	1449	1600	1819.63	1967	1979	1963.06	1614	1366.65
SpWRKY63	239.08	307.78	314.12	406.93	385.99	367.26	295.08	296.95	266.23	310.03	315.01	269.17
SpWRKY64	173.65	151.47	171.2	235.16	193.06	232.1	199.41	228.04	186.86	226.09	245.07	218.12
SpWRKY65	399.28	495.32	563.22	943.99	967.67	1048.45	1279.61	1287.48	1260.17	1035.1	1169.52	927.15
SpWRKY66	510.25	513	595	653	681.22	676	372.11	410.63	391	371.57	351.49	219
SpWRKY67	234	289	352.93	872	837	815	785.67	825.19	857	650	752	807.58
SpWRKY68	882.48	757.57	823.62	1094.03	1081.15	1101.13	1045.98	1074.55	1062.51	1180.17	1167.2	1290.88
