# Supplementary material for: Genome-wide characterization of WRKYs and function of SpWRKY40 and SpWRKY50 in Sesuvium portulacastrum
Source: Research Square preprint supplement (doi:10.21203/rs.3.rs-7513928/v1), 2025-10-20
Supplement: Supplementary file 2 [file 4f18f20b98b7875c6a1fadac.xlsx]

## Sheet: leaf root
Gene	CK Leaves1	CK Leaves2	CK Leaves3	50 Leaves1	50 Leaves2	50 Leaves3	100 Leaves1	100 Leaves2	100 Leaves3	200 Leaves1	200 Leaves2	200 Leaves3	CK Root1	CK Root2	CK Root3	50 Root1	50 Root2	50 Root3	100 Root1	100 Root2	100 Root3	200 Root1	200 Root2	200 Root3
SpWRKY1	0.03	0.03	0.07	0.03	0	0	0.03	0.03	0	0	0.03	0.03	21.95	21.94	22.35	4.29	4.31	4.6	5.24	4.6	5.04	3.02	3.16	3.12
SpWRKY2	0	0	0	0	0	0	0	0	0	0	0	0.04	0.13	0.21	0.21	0.04	0	0.04	0.08	0.24	0.08	0.04	0	0.04
SpWRKY3	3.03	2.52	2.94	2.07	2.28	2.45	2.99	2.93	2.95	2.36	1.95	2.49	2.39	2.53	2.76	5.84	5.38	5.02	4.46	3.96	3.94	5.76	4.95	4.4
SpWRKY4	0.05	0	0.05	0.09	0.15	0.1	0.09	0.12	0	0.07	0.05	0.09	0.19	0.1	0.13	0.15	0	0	0.05	0	0.16	0	0	0.05
SpWRKY5	0	0	0	0.07	0.07	0.21	0	0.21	0.14	0.07	0.14	0.21	0.61	0.37	0.6	0.87	1.03	1.69	1.3	1.04	1.27	1.23	1.09	0.94
SpWRKY6	0	0	0	0.08	0	0	0	0.04	0.08	0.04	0	0.04	0.26	0.69	0.39	1.08	1.36	1.66	1.43	1.74	1.07	1.42	1.88	1.68
SpWRKY7	26.15	27.59	28.85	3.14	3.56	3.12	7.4	6.27	6.31	1.23	1.31	1.34	23.49	24.31	24.78	6.19	7.09	5.28	0.98	1.17	1.5	0.72	1.13	0.97
SpWRKY8	0.31	0.35	0.23	0.33	0.36	0.39	0.37	0.34	0.44	0.12	0.3	0.21	0.25	0.34	0.25	0.04	0.02	0	0.04	0.02	0	0	0.02	0.05
SpWRKY9	53.45	51.49	50.37	42.99	44.12	42.16	40.96	47.93	45.76	41.94	40.6	43.21	35.41	38.05	37.26	41.4	39.6	36.97	39.4	38.85	39.12	39.97	39.01	39.23
SpWRKY10	11.28	8.41	8.4	5.74	6.67	6.44	8.41	9.41	8.82	3.79	3.8	4.45	16.57	14.35	15.16	12.14	11.44	11.9	6.61	7.17	6.5	4.92	4.49	4.79
SpWRKY11	0.25	0.46	0.06	0.14	0.17	0.23	0.2	0.3	0.31	0.25	0.25	0.17	1.37	1.17	1.94	2.89	2.18	1.92	2.8	2.02	2.83	1.98	2.36	2.66
SpWRKY12	3.95	3.9	3.63	4.07	4.81	4.28	5.32	4.23	4.72	4.7	4.78	4.85	3.74	3.36	3.47	6.81	8.26	7.12	7.02	7.76	7.85	7.37	7.57	7.44
SpWRKY13	2.06	2.43	2.04	1.48	1.44	2.12	1.37	1.06	1.32	0.81	0.97	1.02	5.56	5.23	5.36	8.34	8.29	8.17	7.43	7.44	7.83	7.54	7.74	8.21
SpWRKY14	1.26	1.14	1.3	0.73	0.89	0.77	0.6	0.82	0.66	0.64	0.57	0.63	10.14	11.57	12.15	9.47	8.46	8.47	8.29	7.84	7.15	7.9	6.84	7.26
SpWRKY15	5.44	6.13	6.14	2.67	2.91	3.1	4.97	5.17	5.35	3.08	2.85	3.22	11.93	12.21	12.9	7.12	7.21	7.2	6.63	7.2	6.89	6.17	6.39	6.04
SpWRKY16	15.71	13.47	15.02	7	6.37	7.44	12.94	12.62	13.73	4.63	4.52	5.05	27.15	25.21	26.06	19.81	19.14	17.77	8.15	8.6	8.23	6.85	6.88	6.02
SpWRKY17	2.11	1.98	2.51	3.36	2.94	3.53	3.88	4.04	3.74	3.9	4.12	3.61	10.76	11.31	13.06	24.84	24.14	23.69	21.8	21.16	22.62	23.7	21.06	22.71
SpWRKY18	2	1.37	1.37	2.92	2.68	2.49	2.5	2.27	2.17	2.23	2.28	2.27	7.35	6.67	7.99	4.9	4.41	4.13	3.68	3.94	3.41	3.03	3.7	3.12
SpWRKY19	0	0	0	0	0	0	0	0	0	0	0	0	3.59	3.37	4.38	0.74	0.98	0.74	1.04	0.89	1.2	0.59	0.71	0.56
SpWRKY20	3.61	4.41	4.61	2.57	2.7	3.01	3.13	3.06	3.78	1.71	1.91	1.57	4.16	4.7	4.66	24.28	24.86	21.58	16.26	15.73	15.62	15.57	16.72	14.58
SpWRKY21	0.13	0.09	0.1	0.13	0.12	0.07	0.07	0.06	0.15	0	0.13	0.09	1.59	1.88	1.5	0.25	0.12	0.24	0.1	0.06	0.07	0.04	0.06	0.1
SpWRKY22	1.04	0.89	0.87	0.68	0.64	0.9	0.68	0.66	0.87	0.51	0.6	0.54	0.13	0.1	0.06	0.18	0.08	0.09	0.07	0.04	0.07	0	0.05	0.05
SpWRKY23	0	0.02	0	0	0	0	0	0	0	0	0	0	1.79	1.72	1.6	0.57	0.5	0.51	0.77	0.5	0.9	0.42	0.36	0.43
SpWRKY24	2.07	1.93	2.21	1.61	1.84	2.01	2.07	1.72	2.06	2.07	1.95	1.78	2.1	1.72	1.8	1.83	1.79	1.77	1.62	1.44	1.49	1.64	1.42	1.48
SpWRKY25	1.09	1.19	1.39	0.49	0.82	0.65	0.54	0.5	0.61	0.51	0.53	0.73	0.41	0.44	0.66	0.16	0.13	0.16	0.11	0.07	0.14	0.09	0.07	0.11
SpWRKY26	2.39	2.26	2.64	3.52	3.02	3.03	3.8	3.53	3.84	3.29	4	3.64	3.61	3.59	3.64	4.99	4.63	4.3	4.86	4.66	4.65	4.43	4.57	4.02
SpWRKY27	1.9	2.05	2.11	1.07	1.24	1.13	1.19	0.91	1.29	0.59	0.52	0.69	17.49	18.97	18.49	21.14	23.84	21.67	15.88	17.44	15.58	15.1	14.92	14.04
SpWRKY28	64.06	61.17	61.16	22.22	23.12	22.58	46.62	48.26	44.37	13.76	13.81	12.36	100.01	90.29	96.48	74.92	72.23	69.01	26.52	25.75	24.9	20.63	19.36	18.66
SpWRKY29	4.86	4.02	4.23	1.79	1.75	1.9	2.44	2.34	2.94	1.69	2.34	1.68	8.79	9.71	9.04	12.3	13.32	12.86	9.79	9.64	9.42	7.76	8.24	8.64
SpWRKY30	2.94	2.1	2.71	2.8	2.35	2.19	3.46	3.86	3.21	1.71	1.35	1.1	0.43	0.4	0.54	3.54	3.52	3.75	3.14	2.66	3.12	2.63	3.02	3.29
SpWRKY31	2.56	2.16	2.45	2.63	2.87	2.24	3.53	3	3.43	1.74	1.52	1.11	4.88	5.49	4.98	6.23	6.62	5.8	14.03	16.09	15.83	5.02	5.75	4.81
SpWRKY32	0.44	0.39	0.48	0.66	0.4	0.66	0.55	0.77	0.93	0.23	0.3	0.23	0.33	0.44	0.47	0.94	1.08	0.97	3.62	3.32	3.46	0.55	0.5	0.53
SpWRKY33	2.47	2.57	2.63	2.42	2.28	2.26	2.34	2.05	2.08	2.25	2.65	2.43	2.53	2.26	2.5	2.77	2.86	2.88	2.51	2.93	2.78	2.63	2.33	2.45
SpWRKY34	0.76	0.54	0.64	0.38	0.56	0.44	0.67	0.62	0.62	0.33	0.31	0.23	1.79	1.72	1.52	1.36	1.53	1.2	0.94	1.01	1.1	0.94	0.69	0.92
SpWRKY35	6.39	6.28	4.01	3.36	1.45	1.64	2.78	2.98	4.26	2.03	1.46	1.35	11.24	11.04	11.51	2.04	2.02	1.69	2.24	1.77	1.96	1.61	1.1	1.69
SpWRKY36	0.45	0.38	0.52	0.92	0.88	1.17	1.1	1.27	1	0.88	0.86	0.52	0.65	1.15	0.68	4.22	3.9	3.67	4.42	4.13	4.41	3.31	4.3	3.74
SpWRKY37	9.69	9.92	9.5	12.08	12.49	13.23	11.66	11.29	11.37	11.59	12.71	13.01	14.93	14.72	15.53	20.13	21.38	21.61	24.23	23.54	25.87	21.98	22.3	22.88
SpWRKY38	8.93	8.57	8.34	9.43	9.55	10.49	8.87	8.3	9.33	8.6	8.77	8.52	15.09	14.1	15.63	19.16	20.43	19.96	20.54	19.97	19.4	19.26	18.92	19.66
SpWRKY39	20.05	20.14	19.2	19.13	17.98	18.75	16.98	16.07	15.86	13.66	13.42	14.54	17.91	17.12	17.58	32.93	32.95	31.75	29.46	27.98	30.26	31.5	31.37	30.55
SpWRKY40	64.61	62.79	65.57	16.26	17.14	17.13	43.88	40.73	43.22	9.88	10.36	10.27	85.92	83.21	86.05	49.33	52.64	51.66	15.04	14.49	14.54	8.03	7.7	8.15
SpWRKY41	1.13	1.05	1.23	0.24	0.33	0.55	0.45	0.49	0.66	0.34	0.39	0.3	9.88	10.74	10.56	1.91	1.62	2.12	2.39	1.83	1.89	1.87	1.81	2.03
SpWRKY42	0.92	0.93	1.18	0.95	0.82	0.9	1.3	1.09	1.56	0.71	0.92	1.01	0.86	0.7	1.05	1.19	1.29	1.42	1.69	1.78	1.8	1.02	1.14	1.13
SpWRKY43	2.11	2.38	2.1	0.98	1.18	0.83	1.19	1.56	1.35	1.15	0.95	1.03	4.88	5.82	5.87	4.64	4.11	4.34	3.94	3.82	3.54	3.43	3.17	3.6
SpWRKY44	7.59	7.72	7.44	9.65	10.61	10.29	10.15	9.91	10.12	9.85	8.7	9.31	18.14	16.55	18.2	19.99	19.28	20.56	21.88	21.48	21.13	19.54	19.55	21.3
SpWRKY45	1.76	1.66	1.71	1.74	1.62	1.56	2.11	2.47	1.98	1.74	1.66	2.37	1.8	1.9	1.64	1.91	2.09	2	4.66	4.43	4.91	1.91	1.56	2.17
SpWRKY46	0.03	0	0	0.03	0	0.04	0	0	0	0.03	0	0	8.55	9.35	9.1	1.08	0.87	0.92	1.61	1.29	1.45	0.76	0.9	0.44
SpWRKY47	0	0.03	0.1	0	0	0.08	0	0.02	0.04	0	0.04	0	1.36	1.64	1.74	0.24	0.17	0.26	0.16	0.15	0.02	0.04	0.04	0.17
SpWRKY48	0.19	0.19	0.21	0.19	0.05	0.2	0.1	0.1	0.23	0.02	0.15	0.02	0.16	0.05	0.13	0.05	0.13	0.08	0	0.1	0.03	0	0.03	0.05
SpWRKY49	4.56	4.76	4.14	3.88	4.78	4.56	4.62	4.4	5.59	4.6	5.98	4.96	8.67	10.04	8.63	9.8	10.3	9.19	8.34	8.37	8.05	8.98	8.91	8
SpWRKY50	78.52	71.85	70.61	13.58	13.6	13.91	25.33	23.42	26.06	5.14	5.22	6.51	27.17	27.28	27.6	18.01	18.4	17.39	4.54	3.75	3.65	2.85	3.02	3.15
SpWRKY51	105.1	107.82	110.55	38.29	37.79	36.53	93.68	85.62	92.59	20.71	22.63	21.07	142.08	133.09	142.01	99.97	100.85	99.29	30.28	29.52	30.55	14.66	16.22	15.08
SpWRKY52	1.15	1.27	1.43	0.23	0.13	0.23	0.85	1.07	0.93	0.11	0.11	0.1	3.5	3.58	3.58	4.79	4.98	4.8	1.82	1.65	2	1.47	1.28	1.47
SpWRKY53	1.71	2.18	1.93	0.54	0.92	0.61	1.48	1.25	1.68	0.61	0.62	0.33	39.14	39.04	42.17	3.28	3.38	3.55	2.33	1.9	2.41	1.05	1.01	1.2
SpWRKY54	0.63	0.48	0.49	1.24	1.24	1.32	0.9	0.65	1.03	0.87	0.97	0.89	5.49	5.78	5.47	14.51	16.89	14.74	13.03	14.71	13.92	16.18	15.42	14.32
SpWRKY55	0.07	0.02	0.11	0.07	0.02	0.09	0.05	0.05	0.01	0.02	0.07	0.02	0.25	0.36	0.28	0.02	0.02	0	0.12	0.05	0.05	0.02	0	0.02
SpWRKY56	16.39	15.14	16.1	17.55	17.38	18.06	16.86	17.09	15.75	16.77	16.26	16.23	14.63	14.2	13.91	18.29	16.68	15.36	19.77	20.19	20.21	17.37	16.85	16.92
SpWRKY57	48.28	46.64	46.67	13.96	15.09	14.05	29.9	29.84	30.52	9.45	9.88	9.28	16.43	18.07	17.06	16.8	16.86	14.95	5.63	5.73	6.01	5.18	5.08	4.66
SpWRKY58	0.08	0.08	0.08	0	0.17	0.21	0	0.1	0.12	0.11	0.04	0.04	0.07	0.04	0.11	0.63	0.49	0.3	0.33	0.46	0.69	0.39	0.47	0.68
SpWRKY59	0.53	0.7	0.76	1.4	1.24	1.33	1.85	1.61	1.92	0.89	1.06	1.01	0.34	0.53	0.86	2.88	3	3.52	3.8	4.14	3.84	2.78	2.17	3.13
SpWRKY60	5.18	5.09	5.53	4.82	4.88	6.05	5.52	4.88	5.62	5.31	5.38	5.5	16.38	16.54	16.95	12.43	13.62	12.35	10.46	10.37	10.5	12.25	12.38	12.08
SpWRKY61	0.09	0.04	0.13	0	0	0.04	0.13	0.04	0	0.09	0	0.04	0.18	0.09	0.14	0.59	0.29	0.37	0.36	0.3	0.61	0.13	0.31	0.23
SpWRKY62	8.16	8.32	8.13	2.09	2.09	2.07	3.91	3.09	4.21	1.81	1.78	1.8	20.89	21.47	21.31	13.01	13.56	12.66	9.96	10.3	10.24	8.48	8.13	7.99
SpWRKY63	1.37	1.25	1.25	1.45	2	1.94	1.35	1.84	2.13	1.88	1.62	1.52	5.98	6.74	7.16	4.73	5.27	4.57	4.25	5.2	4.16	3.92	3.81	3.83
SpWRKY64	2	1.87	2.02	2.67	2.5	2.89	2.53	2.66	2.54	2.77	2.52	2.85	2.46	2.59	2.36	4.28	4.17	4.41	4.41	4.24	4.27	4.17	4.2	4.17
SpWRKY65	57.12	56.46	55.09	14.89	15.57	14.92	35.3	32.68	34.74	9.59	10.67	10.91	19.77	19.79	21.18	14.64	15.31	16.13	4.9	5.54	5.04	4.68	4.31	4.31
SpWRKY66	1.86	1.53	1.6	0.44	0.63	0.38	0.77	0.94	0.89	0.26	0.4	0.51	9.8	9.57	9.48	1.16	1.15	0.83	1.57	1.47	1.48	0.75	0.86	0.81
SpWRKY67	5.26	5.46	5.02	2.25	2.18	2.4	2.82	3.07	2.94	2.01	2.13	2.17	7.9	7.57	8.4	11.01	10.17	10.7	7.13	7.5	8.15	6.78	6.17	6.76
SpWRKY68	8.74	8.52	9.09	9.93	10.59	11.05	10.48	10.9	10.87	10.97	10.81	10.78	14.54	15.63	15.11	21.01	21.07	21.73	22.82	21.25	23.34	21.12	20.67	20.99
