# Supplementary material for: Genome-wide characterization of WRKYs and function of SpWRKY40 and SpWRKY50 in Sesuvium portulacastrum
Source: Research Square preprint supplement (doi:10.21203/rs.3.rs-7513928/v1), 2025-10-20
Supplement: Supplementary file 3 [file 69874cf419166a1242b28246.docx]

**Table S4. Primers used in this study.**

| Forward primer | Reverse primer | Description |
| --- | --- | --- |
| TCAGACACAAGCAGCTAGGC | TGCTGGTTTTGGTTTCCCCT | qRT-PCR of *SpWRKY40* |
| TCCGACAACAGGGGCTTTAC | TGCTGGTTTTGGTTTCCCCT | qRT-PCR of *SpWRKY51* |
| TTGGCATCGTTGAGGGTCT | CAGTGGGAACACGGAAAGC | qRT-PCR for *SpGAPDH* |
| GAGAACACGGGGGACTCTAGAATGGGATGCTCTAGTACTGC | GCTCACCATGGTACCCCCGGGGCAAAGCAATGATTCGAAAAAAA | Sublocation for *SpWRKY40* |
| GAGAACACGGGGGACTCTAGAATGGGATTCTCTTCTACTGC | GCTCACCATGGTACCCCCGGGGCAAAGCAATGATTCAAAAAAAA | Sublocation for *SpWRKY51* |
| GCCACCTCGCCCAATGGTACCAGTCAACGAGTCAACGAGTCAACG | TGCGTCCGGCGTAGAGGATCCCGTTGACTCGTTGACTCGTTGACT | Cloning MA1076 into pHis2 |
| GCCACCTCGCCCAATGGTACCAGACAACGAGACAACGAGACAACG | TGCGTCCGGCGTAGAGGATCCCGTTGTCTCGTTGTCTCGTTGTCT | Cloning MA1076_mutant into pHis2 |
| GCCACCTCGCCCAATGGTACCTTGACCGAGCCTTGACCGAGCC | TGCGTCCGGCGTAGAGGATCCGGCTCGGTCAAGGCTC | Cloning MA0589 into pHis2 |
| GCCACCTCGCCCAATGGTACCTTAACCGAGCCTTAACCGAGCC | TGCGTCCGGCGTAGAGGATCCGGCTCGGTTAAGGCTC | Cloning MA0589_mutant into pHis2 |

**Table S5. Basic information of *SpWRKYs* identified in *S. portulacastrum.***

| Gene name | Protein ID | | **amino acids**  (aa) | MW (Da) | Isoelectric point (pI) | Aliphatic index | Grand average of hydropathicity | Instability index | Subcellular localization |
| --- | --- | --- | --- | --- | --- | --- | --- | --- | --- |
| *Spor0438730* | SpWRKY1 | 305 | | 34346.89 | 5.64 | 54.98 | -0.882 | 46.96 | Nuclear |
| *Spor0366980* | SpWRKY2 | 265 | | 30076.65 | 9.03 | 55.17 | -1.036 | 47.6 | Extracellular |
| *Spor0260040* | SpWRKY3 | 357 | | 39952.97 | 10.04 | 69.89 | -0.692 | 55.75 | Nuclear |
| *Spor0307250* | SpWRKY4 | 243 | | 28134.83 | 8.13 | 44.44 | -1.201 | 49.65 | Nuclear |
| *Spor0252040* | SpWRKY5 | 143 | | 16838.93 | 9.61 | 61.89 | -1.158 | 49.67 | Nuclear |
| *Spor0074100* | SpWRKY6 | 217 | | 24386.11 | 5.53 | 67.33 | -0.758 | 46.45 | Nuclear |
| *Spor0351980* | SpWRKY7 | 347 | | 38037.49 | 8.24 | 64.06 | -0.699 | 44.92 | Nuclear |
| *Spor0244550* | SpWRKY8 | 492 | | 54550.01 | 7.73 | 50.12 | -0.958 | 67.19 | Nuclear |
| *Spor0389800* | SpWRKY9 | 1314 | | 144736.1 | 9.16 | 73.01 | -0.593 | 47.89 | Extracellular |
| *Spor0383930* | SpWRKY10 | 219 | | 23889.96 | 9.48 | 58.40 | -0.669 | 45.18 | Nuclear |
| *Spor0466420* | SpWRKY11 | 323 | | 35417.03 | 6.15 | 52.51 | -0.830 | 55.53 | Nuclear |
| *Spor0399500* | SpWRKY12 | 627 | | 67851.44 | 9.22 | 56.16 | -0.911 | 49.24 | Extracellular |
| *Spor0009980* | SpWRKY13 | 107 | | 12285.08 | 6.40 | 72.80 | -0.590 | 21.50 | Nuclear |
| *Spor0378350* | SpWRKY14 | 304 | | 33209.33 | 6.59 | 43.62 | -0.941 | 65.48 | Nuclear |
| *Spor0443530* | SpWRKY15 | 639 | | 69681.77 | 6.23 | 59.89 | -0.828 | 49.81 | Nuclear |
| *Spor0016220* | SpWRKY16 | 364 | | 39590.61 | 9.62 | 64.12 | -0.612 | 52.63 | Nuclear |
| *Spor0457780* | SpWRKY18 | 287 | | 31461.49 | 5.52 | 50.98 | -0.830 | 52.51 | Nuclear |
| *Spor0259060* | SpWRKY19 | 543 | | 58529.04 | 5.12 | 59.48 | -0.796 | 44.51 | Nuclear |
| *Spor0541220* | SpWRKY20 | 291 | | 32926.13 | 8.76 | 72.65 | -0.758 | 44.00 | Extracellular |
| *Spor0423760* | SpWRKY21 | 531 | | 58137.12 | 5.71 | 63.62 | -0.832 | 41.82 | Nuclear |
| *Spor0017410* | SpWRKY22 | 484 | | 53691.04 | 7.73 | 49.36 | -0.999 | 63.87 | Nuclear |
| *Spor0388680* | SpWRKY23 | 646 | | 70307.67 | 5.66 | 56.19 | -0.890 | 41.84 | Extracellular |
| *Spor0211420* | SpWRKY24 | 859 | | 94169.78 | 5.76 | 65.82 | -0.617 | 52.56 | Extracellular |
| *Spor0382470* | SpWRKY25 | 494 | | 54677.25 | 7.27 | 50.12 | -0.942 | 67.65 | Nuclear |
| *Spor0166850* | SpWRKY26 | 519 | | 56326.85 | 6.41 | 51.14 | -0.881 | 56.92 | Nuclear |
| *Spor0205090* | SpWRKY27 | 330 | | 37022.41 | 6.08 | 75.30 | -0.706 | 41.73 | Nuclear |
| *Spor0106790* | SpWRKY28 | 356 | | 38856.56 | 9.85 | 55.37 | -0.791 | 53.65 | Nuclear |
| *Spor0091920* | SpWRKY29 | 448 | | 48280.38 | 6.27 | 56.16 | -0.754 | 49.20 | Nuclear |
| *Spor0202640* | SpWRKY30 | 209 | | 23592.75 | 5.20 | 37.80 | -0.947 | 44.86 | Nuclear |
| *Spor0514710* | SpWRKY31 | 215 | | 25131.37 | 6.96 | 46.60 | -1.208 | 33.91 | Nuclear |
| *Spor0377750* | SpWRKY32 | 210 | | 24525.85 | 7.44 | 49.57 | -1.153 | 32.64 | Nuclear |
| *Spor0589110* | SpWRKY33 | 741 | | 80995.54 | 6.16 | 58.53 | -0.733 | 50.02 | Extracellular |
| *Spor0031720* | SpWRKY34 | 531 | | 58086.03 | 5.74 | 63.09 | -0.817 | 43.17 | Nuclear |
| *Spor0511490* | SpWRKY35 | 514 | | 55986.62 | 7.07 | 57.96 | -0.784 | 46.75 | Nuclear |
| *Spor0396060* | SpWRKY36 | 187 | | 21680.06 | 9.24 | 59.30 | -1.082 | 48.69 | Nuclear |
| *Spor0393330* | SpWRKY37 | 491 | | 54266.75 | 5.38 | 55.93 | -1.074 | 40.60 | Extracellular |
| *Spor0029950* | SpWRKY38 | 465 | | 50867.5 | 8.66 | 57.46 | -0.895 | 47.76 | Nuclear |
| *Spor0156880* | SpWRKY39 | 361 | | 39968.12 | 9.57 | 68.61 | -0.750 | 59.72 | Nuclear |
| *Spor0279350* | SpWRKY40 | 614 | | 66580.01 | 7.25 | 51.51 | -0.819 | 58.71 | Nuclear |
| *Spor0165770* | SpWRKY41 | 570 | | 62222.85 | 8.22 | 57.77 | -0.794 | 50.49 | Nuclear |
| *Spor0045890* | SpWRKY42 | 291 | | 31725.85 | 6.35 | 51.89 | -0.821 | 55.45 | Nuclear |
| *Spor0568180* | SpWRKY43 | 446 | | 48207.37 | 6.30 | 54.24 | -0.778 | 50.46 | Extracellular |
| *Spor0254940* | SpWRKY44 | 491 | | 54458.96 | 5.50 | 54.34 | -1.128 | 42.96 | Extracellular |
| *Spor0437760* | SpWRKY45 | 331 | | 36213.67 | 6.43 | 46.80 | -0.942 | 57.69 | Nuclear |
| *Spor0465490* | SpWRKY46 | 218 | | 24878.51 | 9.81 | 48.76 | -1.106 | 48.79 | Nuclear |
| *Spor0446710* | SpWRKY47 | 520 | | 56724.86 | 6.08 | 66.48 | -0.743 | 43.85 | Nuclear |
| *Spor0518030* | SpWRKY48 | 355 | | 39242.93 | 6.26 | 61.61 | -0.708 | 65.67 | Extracellular |
| *Spor0445730* | SpWRKY49 | 603 | | 65164.97 | 5.87 | 53.00 | -0.783 | 60.37 | Nuclear |
| *Spor0141660* | SpWRKY50 | 347 | | 37885.09 | 8.30 | 60.72 | -0.762 | 44.78 | Nuclear |
| *Spor0315070* | SpWRKY51 | 609 | | 66138.4 | 6.99 | 52.41 | -0.807 | 58.58 | Nuclear |
| *Spor0399400* | SpWRKY52 | 314 | | 35669.15 | 6.27 | 76.69 | -0.725 | 43.18 | Nuclear |
| *Spor0313120* | SpWRKY53 | 392 | | 42122.37 | 5.33 | 51.53 | -0.624 | 56.68 | Nuclear |
| *Spor0155550* | SpWRKY54 | 394 | | 43424.72 | 5.80 | 51.42 | -0.817 | 52.68 | Extracellular |
| *Spor0563350* | SpWRKY55 | 453 | | 50014.57 | 6.34 | 57.13 | -0.846 | 56.04 | Extracellular |
| *Spor0306290* | SpWRKY56 | 810 | | 88452.9 | 5.90 | 58.62 | -0.689 | 53.28 | Extracellular |
| *Spor0153920* | SpWRKY57 | 436 | | 48983.38 | 7.15 | 39.54 | -1.203 | 70.01 | Nuclear |
| *Spor0080080* | SpWRKY58 | 242 | | 27976.74 | 8.23 | 44.26 | -1.185 | 51.72 | Nuclear |
| *Spor0023800* | SpWRKY59 | 186 | | 21587.11 | 9.37 | 60.70 | -1.018 | 44.46 | Nuclear |
| *Spor0422400* | SpWRKY60 | 603 | | 64917.8 | 6.33 | 54.15 | -0.774 | 59.01 | Nuclear |
| *Spor0343150* | SpWRKY61 | 243 | | 28162.93 | 8.47 | 42.47 | -1.214 | 52.10 | Nuclear |
| *Spor0460330* | SpWRKY62 | 634 | | 69055.98 | 6.33 | 60.84 | -0.828 | 50.73 | Nuclear |
| *Spor0043030* | SpWRKY63 | 288 | | 31483.41 | 5.52 | 48.09 | -0.842 | 58.55 | Nuclear |
| *Spor0541310* | SpWRKY64 | 669 | | 72758.96 | 9.10 | 56.85 | -0.906 | 48.32 | Extracellular |
| *Spor0364750* | SpWRKY65 | 548 | | 61080.42 | 5.90 | 44.96 | -1.024 | 65.01 | Nuclear |
| *Spor0374240* | SpWRKY66 | 567 | | 61736.18 | 8.64 | 59.28 | -0.758 | 50.24 | Nuclear |
| *Spor0522900* | SpWRKY67 | 449 | | 48385.51 | 6.30 | 53.21 | -0.758 | 50.47 | Extracellular |
| *Spor0026290* | SpWRKY68 | 478 | | 53086.51 | 5.48 | 55.61 | -1.099 | 45.93 | Extracellular |

**Table S6.** **Prediction of SpWRKYs secondary structure.**

| Protein | Alpha helix | Extended strand | Random coil | Distribution of secondary structure elements |
| --- | --- | --- | --- | --- |
| SpWRKY1 | 11.80% | 4.92% | 83.28% | 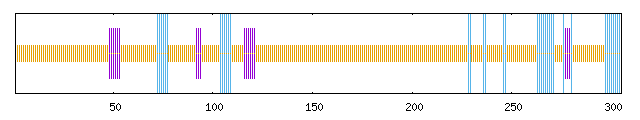 |
| SpWRKY2 | 13.96% | 5.28% | 80.75% | 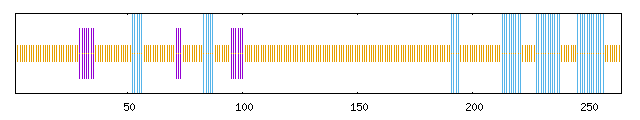 |
| SpWRKY3 | 14.57% | 4.76% | 80.67% | 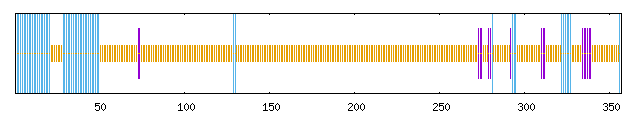 |
| SpWRKY4 | 8.23% | 9.05% | 82.72% | 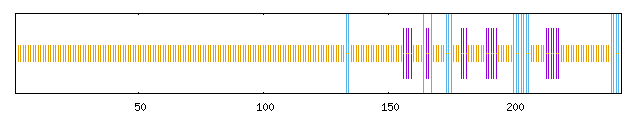 |
| SpWRKY5 | 19.58% | 10.49% | 69.93% | 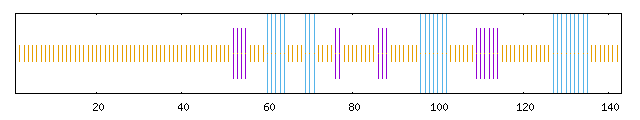 |
| SpWRKY6 | 13.36% | 6.91% | 79.72% | 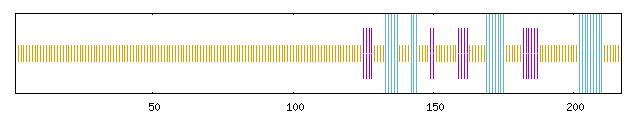 |
| SpWRKY7 | 28.53% | 7.78% | 63.69% | 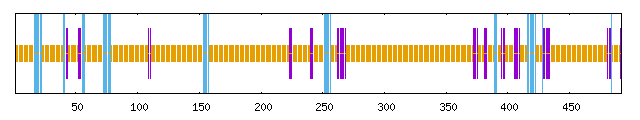 |
| SpWRKY8 | 8.33% | 10.16% | 81.50% | 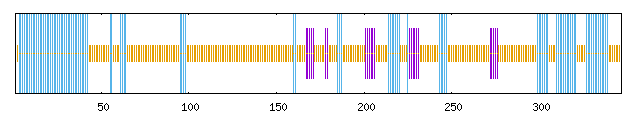 |
| SpWRKY9 | 27.47% | 15.37% | 57.15% | 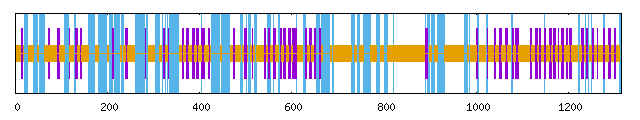 |
| SpWRKY10 | 17.81% | 5.48% | 76.71% | 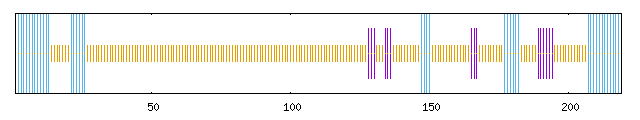 |
| SpWRKY11 | 8.98% | 4.64% | 86.38% | 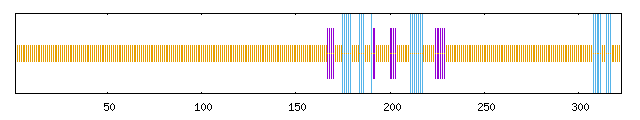 |
| SpWRKY12 | 8.61% | 5.58% | 85.81% | 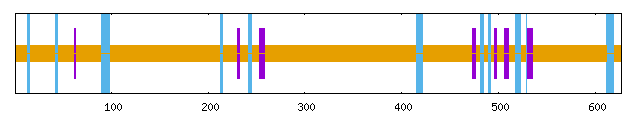 |
| SpWRKY13 | 26.17% | 8.41% | 65.42% | 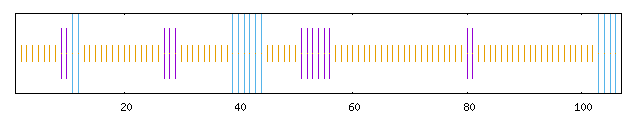 |
| SpWRKY14 | 6.58% | 4.93% | 88.49% | 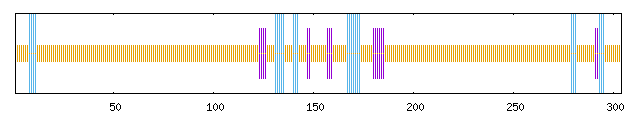 |
| SpWRKY15 | 19.72% | 7.67% | 72.61% | 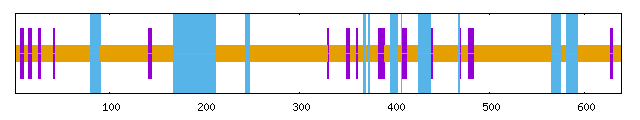 |
| SpWRKY16 | 20.05% | 4.40% | 75.55% | 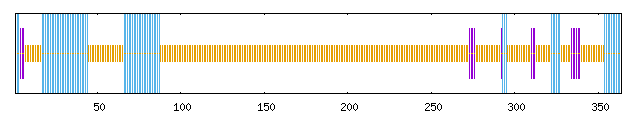 |
| SpWRKY17 | 7.65% | 4.08% | 88.27% | 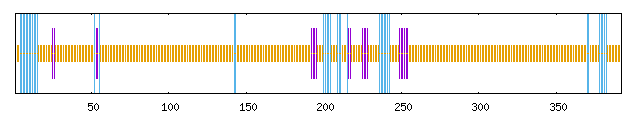 |
| SpWRKY18 | 10.10% | 6.27% | 83.62% | 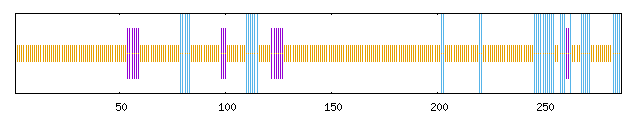 |
| SpWRKY19 | 21.18% | 5.52% | 73.30% | 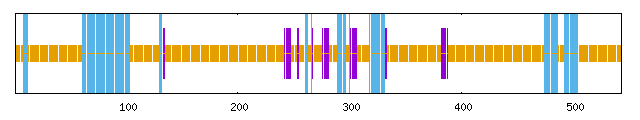 |
| SpWRKY20 | 23.02% | 7.90% | 69.07% | 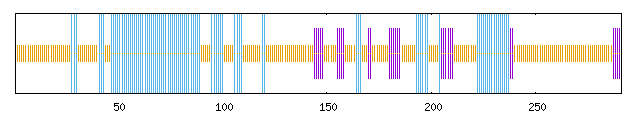 |
| SpWRKY21 | 21.09% | 6.03% | 72.88% | 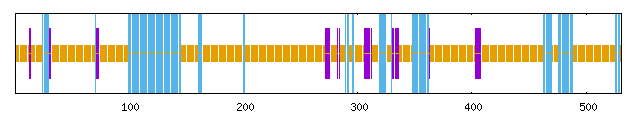 |
| SpWRKY22 | 6.20% | 8.26% | 85.54% | 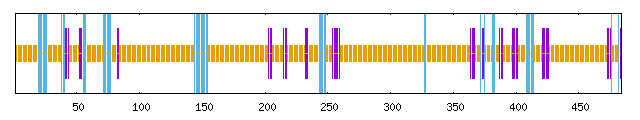 |
| SpWRKY23 | 18.89% | 5.42% | 75.70% | 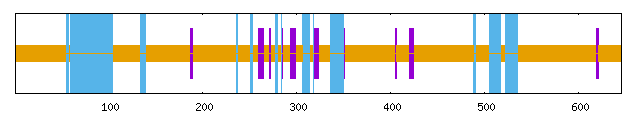 |
| SpWRKY24 | 7.68% | 5.01% | 87.31% | 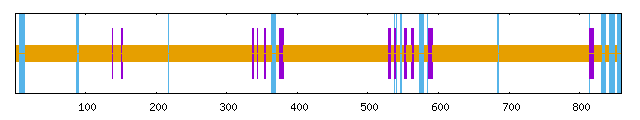 |
| SpWRKY25 | 6.28% | 9.11% | 84.62% | 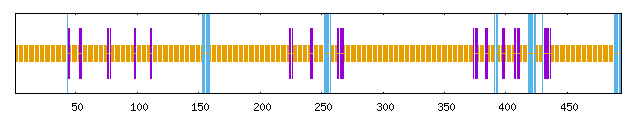 |
| SpWRKY26 | 5.78% | 8.29% | 85.93% | 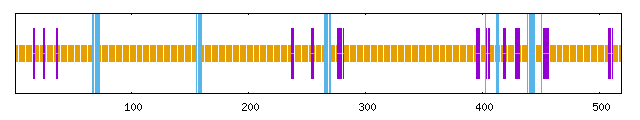 |
| SpWRKY27 | 30.61% | 10.61% | 58.79% | 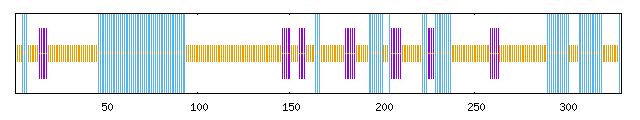 |
| SpWRKY28 | 16.85% | 4.78% | 78.37% | 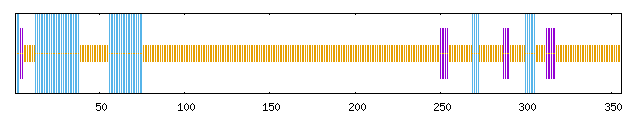 |
| SpWRKY29 | 6.47% | 5.80% | 87.72% | 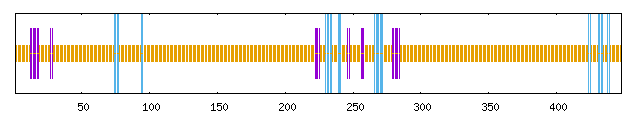 |
| SpWRKY30 | 7.18% | 8.13% | 84.69% | 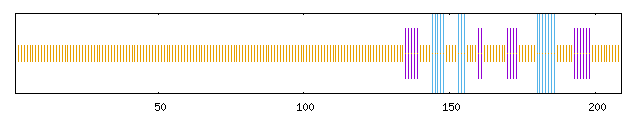 |
| SpWRKY31 | 11.16% | 9.77% | 79.07% | 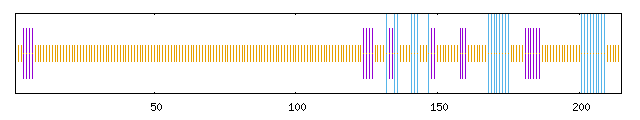 |
| SpWRKY32 | 13.81% | 12.38% | 73.81% | 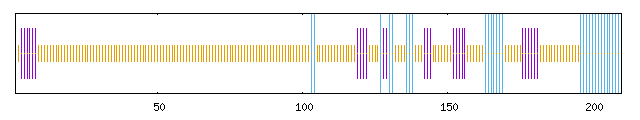 |
| SpWRKY33 | 7.29% | 5.13% | 87.58% | 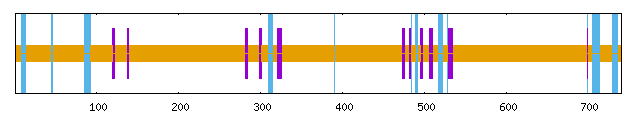 |
| SpWRKY34 | 22.79% | 6.78% | 70.43% | 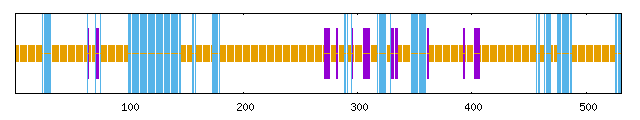 |
| SpWRKY35 | 20.62% | 5.45% | 73.93% | 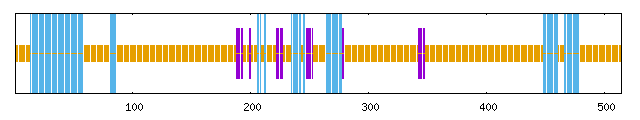 |
| SpWRKY36 | 13.37% | 9.63% | 77.01% | 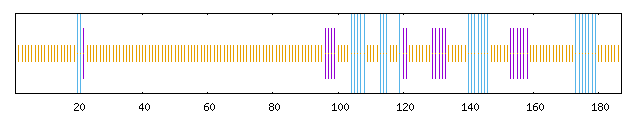 |
| SpWRKY37 | 5.70% | 7.13% | 87.17% | 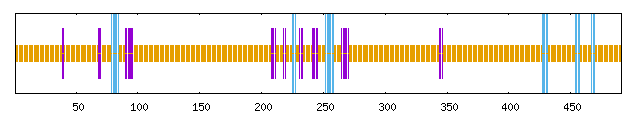 |
| SpWRKY38 | 5.59% | 7.31% | 87.10% | 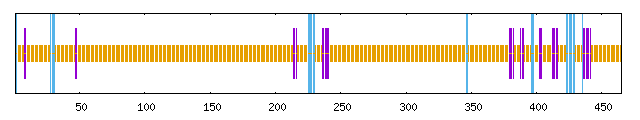 |
| SpWRKY39 | 15.79% | 4.71% | 79.50% | 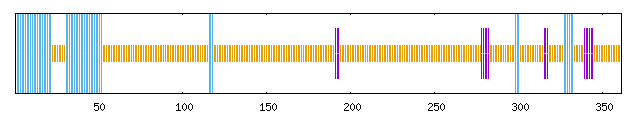 |
| SpWRKY40 | 3.09% | 5.86% | 91.04% | 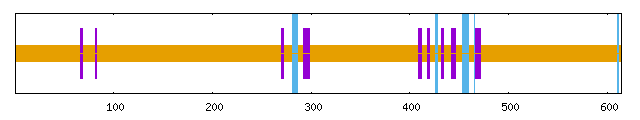 |
| SpWRKY41 | 16.84% | 7.54% | 75.61% | 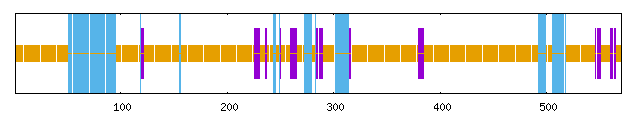 |
| SpWRKY42 | 6.19% | 5.50% | 88.32% | 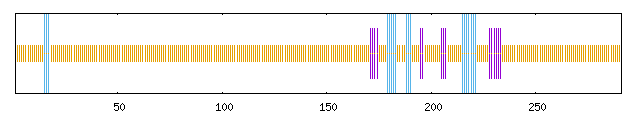 |
| SpWRKY43 | 5.38% | 5.38% | 89.24% | 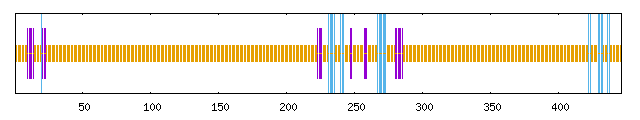 |
| SpWRKY44 | 7.74% | 8.15% | 84.11% | 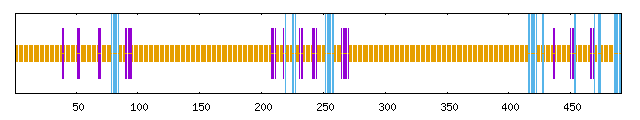 |
| SpWRKY45 | 9.06% | 4.83% | 86.10% | 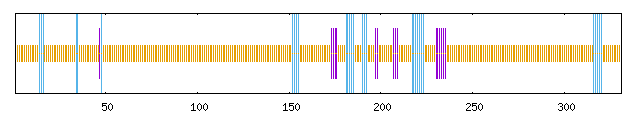 |
| SpWRKY46 | 5.96% | 9.63% | 84.40% | 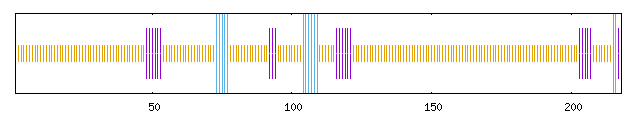 |
| SpWRKY47 | 24.42% | 6.73% | 68.85% | 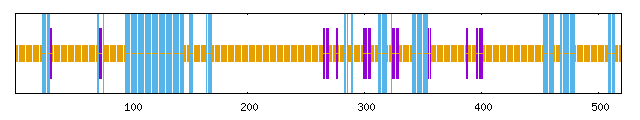 |
| SpWRKY48 | 14.65% | 4.51% | 80.85% | 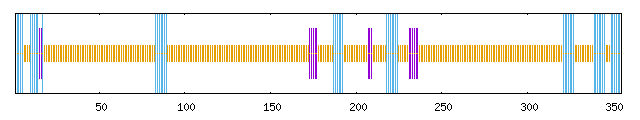 |
| SpWRKY49 | 3.32% | 7.30% | 89.39% | 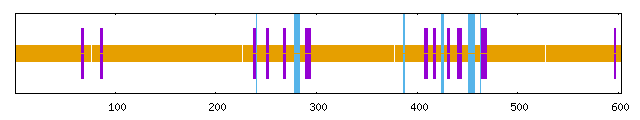 |
| SpWRKY50 | 32.85% | 8.36% | 58.79% | 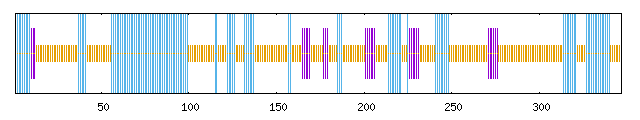 |
| SpWRKY51 | 5.42% | 6.73% | 87.85% | 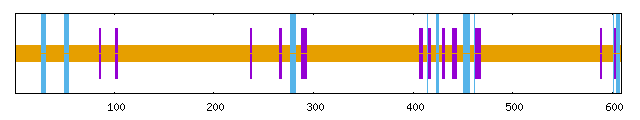 |
| SpWRKY52 | 30.25% | 9.24% | 60.51% | 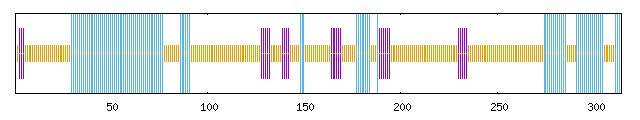 |
| SpWRKY53 | 12.76% | 4.85% | 82.40% | 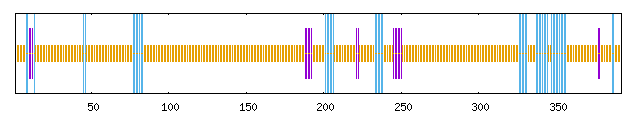 |
| SpWRKY54 | 8.63% | 5.58% | 85.79% | 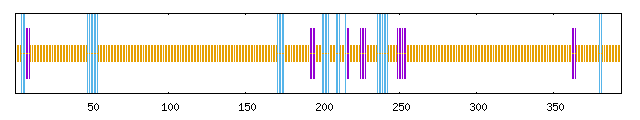 |
| SpWRKY55 | 13.25% | 7.95% | 78.81% | 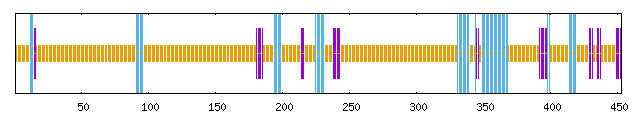 |
| SpWRKY56 | 6.67% | 5.68% | 87.65% | 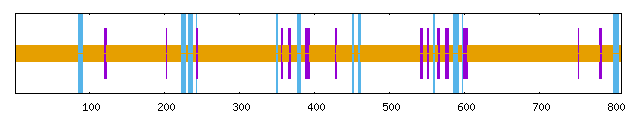 |
| SpWRKY57 | 4.59% | 6.65% | 88.76% | 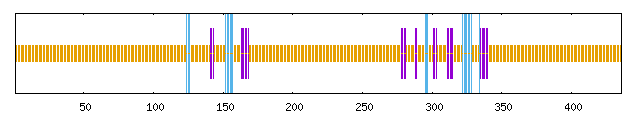 |
| SpWRKY58 | 8.68% | 9.09% | 82.23% | 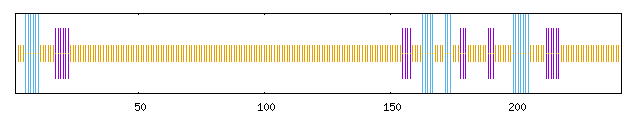 |
| SpWRKY59 | 14.52% | 8.60% | 76.88% | 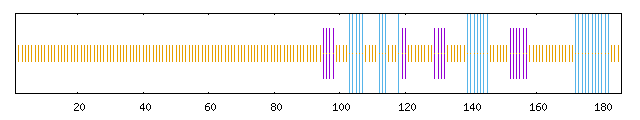 |
| SpWRKY60 | 5.47% | 5.80% | 88.72% | 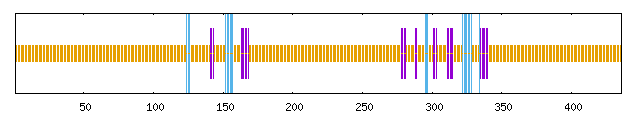 |
| SpWRKY61 | 9.05% | 9.88% | 81.07% | 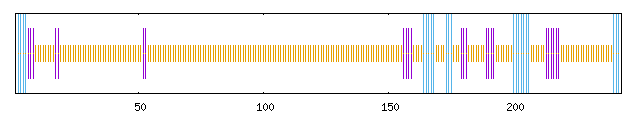 |
| SpWRKY62 | 17.03% | 7.41% | 75.55% | 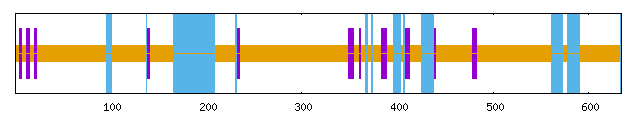 |
| SpWRKY63 | 12.85% | 6.25% | 80.90% | 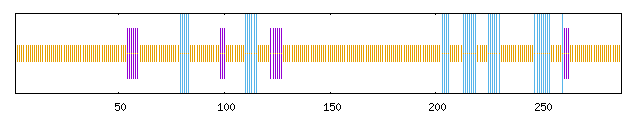 |
| SpWRKY64 | 5.68% | 5.23% | 89.09% | 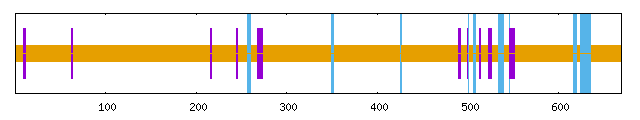 |
| SpWRKY65 | 6.20% | 6.57% | 87.23% | 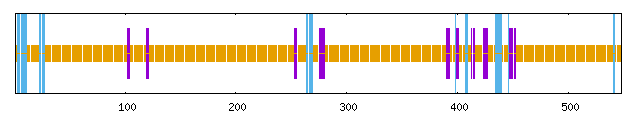 |
| SpWRKY66 | 19.58% | 7.41% | 73.02% | 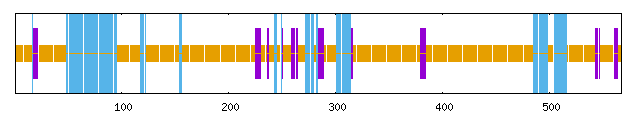 |
| SpWRKY67 | 8.24% | 6.01% | 85.75% | 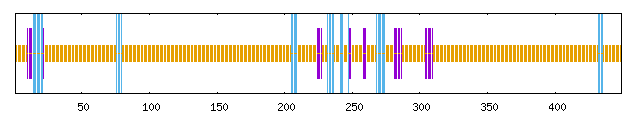 |
| SpWRKY68 | 6.07% | 7.11% | 86.82% | 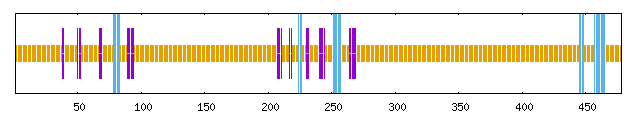 |

**Table S7. Ka, Ks, and Ka/Ks values for the homologous gene pair gene 1 and gene 2 in *SpWRKYs*.**

| Gene 1 | Gene 2 | Ka | Ks | Ka/Ks |
| --- | --- | --- | --- | --- |
| *SpWRKY46* | *SpWRKY1* | 0.076977165 | 0.183935272 | 0.418501378 |
| *SpWRKY4* | *SpWRKY61* | 0.027366977 | 0.077261235 | 0.354213551 |
| *SpWRKY4* | *SpWRKY58* | 0.023663422 | 0.077216 | 0.306457496 |
| *SpWRKY5* | *SpWRKY31* | 0.291465797 | 2.049002582 | 0.142247648 |
| *SpWRKY22* | *SpWRKY8* | 0.017141026 | 0.053230471 | 0.322015292 |
| *SpWRKY11* | *SpWRKY42* | 0.048063064 | 0.164480203 | 0.292211848 |
| *SpWRKY11* | *SpWRKY45* | 0.023065696 | 0.101809944 | 0.226556413 |
| *SpWRKY12* | *SpWRKY64* | 0.031055534 | 0.064480227 | 0.481628797 |
| *SpWRKY62* | *SpWRKY15* | 0.014213506 | 0.134239378 | 0.105881793 |
| *SpWRKY47* | *SpWRKY15* | 0.431666941 | 1.869305256 | 0.230923729 |
| *SpWRKY34* | *SpWRKY15* | 0.418596517 | 1.91610739 | 0.218461929 |
| *SpWRKY21* | *SpWRKY15* | 0.453039817 | 2.018790966 | 0.224411455 |
| *SpWRKY18* | *SpWRKY46* | 0.483624611 | 3.469145699 | 0.139407408 |
| *SpWRKY18* | *SpWRKY63* | 0.01371641 | 0.073938453 | 0.18551118 |
| *SpWRKY19* | *SpWRKY41* | 0.510605063 | 1.910262512 | 0.267295756 |
| *SpWRKY19* | *SpWRKY35* | 0.462673732 | 1.915023464 | 0.241602122 |
| *SpWRKY27* | *SpWRKY20* | 0.059845301 | 0.104334602 | 0.57359016 |
| *SpWRKY52* | *SpWRKY20* | 0.114615893 | 0.190678805 | 0.601094036 |
| *SpWRKY47* | *SpWRKY21* | 0.018318979 | 0.066778156 | 0.274325918 |
| *SpWRKY62* | *SpWRKY21* | 0.43556933 | 2.067151377 | 0.210709934 |
| *SpWRKY34* | *SpWRKY21* | 0.014633619 | 0.023353869 | 0.626603625 |
| *SpWRKY66* | *SpWRKY23* | 0.48907444 | 2.343801826 | 0.208667147 |
| *SpWRKY24* | *SpWRKY33* | 0.016995375 | 0.040633722 | 0.418257896 |
| *SpWRKY27* | *SpWRKY52* | 0.047982992 | 0.118105499 | 0.406272291 |
| *SpWRKY29* | *SpWRKY43* | 0.008825073 | 0.047662092 | 0.185159167 |
| *SpWRKY29* | *SpWRKY67* | 0.018191649 | 0.084767541 | 0.214606307 |
| *SpWRKY59* | *SpWRKY31* | 0.35211036 | 2.439664109 | 0.144327393 |
| *SpWRKY32* | *SpWRKY36* | 0.326339537 | 1.802565112 | 0.181041747 |
| *SpWRKY56* | *SpWRKY33* | 0.025904426 | 0.049189728 | 0.526622673 |
| *SpWRKY47* | *SpWRKY34* | 0.019994242 | 0.066930627 | 0.298730836 |
| *SpWRKY62* | *SpWRKY34* | 0.401432696 | 2.087975551 | 0.192259289 |
| *SpWRKY40* | *SpWRKY51* | 0.013024929 | 0.070167998 | 0.185624924 |
| *SpWRKY41* | *SpWRKY35* | 0.023282293 | 0.046690104 | 0.49865583 |
| *SpWRKY42* | *SpWRKY45* | 0.032123187 | 0.119493323 | 0.268828298 |
| *SpWRKY43* | *SpWRKY67* | 0.017124032 | 0.08885087 | 0.192727787 |
| *SpWRKY68* | *SpWRKY44* | 0.056360914 | 0.063756161 | 0.884007329 |
| *SpWRKY44* | *SpWRKY49* | 0.527911255 | 1.744862467 | 0.302551785 |
| *SpWRKY44* | *SpWRKY60* | 0.522460381 | 1.814636438 | 0.287914632 |
| *SpWRKY46* | *SpWRKY63* | 0.497764398 | 2.218098632 | 0.224410398 |
| *SpWRKY47* | *SpWRKY62* | 0.427469245 | 1.985250549 | 0.215322567 |
| *SpWRKY55* | *SpWRKY48* | 0.083229923 | 0.101151939 | 0.822820842 |
| *SpWRKY68* | *SpWRKY49* | 0.561865944 | 2.070334752 | 0.271388935 |
| *SpWRKY49* | *SpWRKY60* | 0.016076611 | 0.074533768 | 0.215695673 |
| *SpWRKY7* | *SpWRKY50* | 0.021169819 | 0.074163035 | 0.285449738 |
| *SpWRKY53* | *SpWRKY55* | 0.702869154 | 2.877127029 | 0.244295489 |
| *SpWRKY65* | *SpWRKY57* | 0.024107632 | 0.068207569 | 0.35344512 |
| *SpWRKY61* | *SpWRKY58* | 0.010593085 | 0.012966287 | 0.816971312 |
| *SpWRKY68* | *SpWRKY60* | 0.555973357 | 1.72950349 | 0.321464143 |

**Table S8. WGD/segmental duplication event of *SpWRKYs* in *S. portulacastrum.***

| Gene ID | Duplication type | |
| --- | --- | --- |
| *SpWRKY1* | | WGD or Segmental |
| *SpWRKY2* | | WGD or Segmental |
| *SpWRKY3* | | WGD or Segmental |
| *SpWRKY4* | | WGD or Segmental |
| *SpWRKY5* | | WGD or Segmental |
| *SpWRKY6* | | WGD or Segmental |
| *SpWRKY7* | | WGD or Segmental |
| *SpWRKY8* | | WGD or Segmental |
| *SpWRKY9* | | WGD or Segmental |
| *SpWRKY10* | | WGD or Segmental |
| *SpWRKY11* | | WGD or Segmental |
| *SpWRKY12* | | WGD or Segmental |
| *SpWRKY13* | | WGD or Segmental |
| *SpWRKY14* | | WGD or Segmental |
| *SpWRKY15* | | WGD or Segmental |
| *SpWRKY16* | | WGD or Segmental |
| *SpWRKY17* | | WGD or Segmental |
| *SpWRKY18* | | WGD or Segmental |
| *SpWRKY19* | | WGD or Segmental |
| *SpWRKY20* | | WGD or Segmental |
| *SpWRKY21* | | WGD or Segmental |
| *SpWRKY22* | | WGD or Segmental |
| *SpWRKY23* | | WGD or Segmental |
| *SpWRKY24* | | WGD or Segmental |
| *SpWRKY25* | | WGD or Segmental |
| *SpWRKY26* | | WGD or Segmental |
| *SpWRKY27* | | WGD or Segmental |
| *SpWRKY28* | | WGD or Segmental |
| *SpWRKY29* | | WGD or Segmental |
| *SpWRKY30* | | WGD or Segmental |
| *SpWRKY31* | | WGD or Segmental |
| *SpWRKY32* | | WGD or Segmental |
| *SpWRKY33* | | WGD or Segmental |
| *SpWRKY34* | | WGD or Segmental |
| *SpWRKY35* | | WGD or Segmental |
| *SpWRKY36* | | WGD or Segmental |
| *SpWRKY37* | | WGD or Segmental |
| *SpWRKY38* | | Dispersed |
| *SpWRKY39* | | WGD or Segmental |
| *SpWRKY40* | | WGD or Segmental |
| *SpWRKY41* | | WGD or Segmental |
| *SpWRKY42* | | WGD or Segmental |
| *SpWRKY43* | | WGD or Segmental |
| *SpWRKY44* | | WGD or Segmental |
| *SpWRKY45* | | WGD or Segmental |
| *SpWRKY46* | | WGD or Segmental |
| *SpWRKY47* | | WGD or Segmental |
| *SpWRKY48* | | WGD or Segmental |
| *SpWRKY49* | | WGD or Segmental |
| *SpWRKY50* | | WGD or Segmental |
| *SpWRKY51* | | WGD or Segmental |
| *SpWRKY52* | | WGD or Segmental |
| *SpWRKY53* | | WGD or Segmental |
| *SpWRKY54* | | WGD or Segmental |
| *SpWRKY55* | | WGD or Segmental |
| *SpWRKY56* | | WGD or Segmental |
| *SpWRKY57* | | WGD or Segmental |
| *SpWRKY58* | | WGD or Segmental |
| *SpWRKY59* | | WGD or Segmental |
| *SpWRKY60* | | WGD or Segmental |
| *SpWRKY61* | | WGD or Segmental |
| *SpWRKY62* | | WGD or Segmental |
| *SpWRKY63* | | WGD or Segmental |
| *SpWRKY64* | | WGD or Segmental |
| *SpWRKY65* | | WGD or Segmental |
| *SpWRKY66* | | WGD or Segmental |
| *SpWRKY67* | | WGD or Segmental |
| *SpWRKY68* | | WGD or Segmental |
