# Supplementary material for: Genome-wide characterization of WRKYs and function of SpWRKY40 and SpWRKY50 in Sesuvium portulacastrum
Source: Research Square preprint supplement (doi:10.21203/rs.3.rs-7513928/v1), 2025-10-20
Supplement: Supplementary file 4 [file e6b7f94ea72e1d1efeab211d.xlsx]

## Sheet: Sheet1
ID	CK 1	CK 2	CK 3	200 1	200 2	200 3	400 1	400 2	400 3	600 1	600 2	600 3	800 1	800 2	800 3	1000 1	1000 2	1000 3
SpWRKY1	0	0	0	0	0	0.05	0	0	0	0.05	0	0	0	0	0.1	0.09	0	0.22
SpWRKY2	0	0	0	0	0	0	0	0	0.05	0	0.04	0	0.04	0	0	0	0.06	0.3
SpWRKY3	1.25	1.71	1.36	1.73	1.7	1.43	2.08	1.67	1.6	1.48	1.77	1.07	1.12	1.4	0.85	0.33	0.53	0.18
SpWRKY4	0	0.26	0.06	0	0.07	0	0.19	0.22	0.2	0.2	0.17	0.07	0.05	0.24	0.43	0.12	0	0.12
SpWRKY5	0	0	0	0	0	0	0	0	0	0.09	0	0	0.6	0.18	0.73	3.3	1.93	2.82
SpWRKY6	0	0	0	0.04	0.06	0	0	0	0	0.11	0.04	0.11	0.04	0.05	0	0.52	0.6	0.56
SpWRKY7	25.66	25.65	27.66	30.82	30.55	31.19	15.41	15.71	16.63	42.06	44.2	48.66	35.23	38.92	36.57	3.36	4.88	5.02
SpWRKY8	2.82	2.27	2.81	2.9	3.45	2.88	1.86	1.15	1.44	1.34	1.39	0.94	1.12	0.94	0.72	0.1	0.11	0.25
SpWRKY9	59.51	54.88	59.45	60.89	56.37	57.74	73.45	68.06	74.03	72.84	75.57	60.39	42.42	45.7	42.96	18.89	22.29	21.08
SpWRKY10	6.91	6.06	5.14	7.8	6.77	7.41	6.89	7.99	8.42	4.68	4.96	3.89	6.68	5.05	7.46	11.06	7.42	9.5
SpWRKY11	0	0	0.15	0.02	0.13	0.04	0.15	0	0.04	0.15	0.22	0.28	0.86	0.44	0.93	0.62	0.55	0.69
SpWRKY12	4.02	4.09	5.38	4.33	4.57	5.01	4.54	5.31	5.58	5.9	5.72	4.92	6.65	6.32	6.42	8.62	11.71	10.71
SpWRKY13	9.13	11.2	9.01	9.94	11.28	10.17	7.77	7.1	6.67	8.01	7.44	7.28	7.49	7.55	6.89	7.11	8.05	8.11
SpWRKY14	2.56	2.4	2.7	2.08	2.39	1.84	2.15	2.01	1.64	2.36	2.09	3.64	2.34	2.44	3.49	0.51	0.91	0.48
SpWRKY15	5.14	4.52	6.03	5.14	4.81	4.85	2.71	2.5	2.41	3.02	3.39	3.53	10.5	9.62	9.8	19.04	31.01	27.16
SpWRKY16	24.22	25.82	28.96	23.39	23.45	24.74	25.44	24.13	26.97	20.19	19.22	20.81	19.36	20.87	20.36	12.56	16.2	18.12
SpWRKY17	2.72	2.23	2.35	1.93	1.59	2.17	1.9	2.21	1.91	1.82	2.56	3.09	6.33	8.03	7.17	8.66	12	10.47
SpWRKY18	0.63	0.68	0.77	1.07	1.69	1.91	1.2	1.33	1.63	0.83	1.28	1.41	2.23	1.48	2.09	1.14	1.02	0.64
SpWRKY19	0	0	0	0	0	0	0	0	0	0	0	0	0	0	0	0.03	0	0
SpWRKY20	63.79	60.93	69.84	49.48	51.13	50.5	31.62	35.6	35.26	45.91	44.51	47.28	52.31	61.06	59.33	2.96	3.32	4.36
SpWRKY21	0	0	0	0	0	0	0	0	0	0	0	0	0	0	0	0	0	0
SpWRKY22	1.94	1.88	2.13	1.77	2.22	2.34	1.33	1.67	1.22	1.58	1.49	1.42	0.44	0.8	0.74	0.16	0.08	0.18
SpWRKY23	0	0	0	0	0	0	0	0	0	0	0	0	0	0	0	0	0.02	0
SpWRKY24	0.77	1.14	1.44	0.76	0.46	0.98	1.19	0.84	1.19	1.34	1.17	1.37	1.32	0.96	0.96	0.8	1.25	0.34
SpWRKY25	3.92	3.34	5.49	2.55	2.81	3.24	3.03	2.85	2.48	1.51	1.62	1.56	1.32	0.96	1.55	0.67	1.34	1.15
SpWRKY26	1.45	1.16	1.5	1.9	2.29	2.05	1.81	1.71	1.7	1.6	1.88	1.57	3.43	3.98	4.35	5.07	6	6.1
SpWRKY27	29.7	31.1	33.05	16.41	17.5	17.91	18	16.34	15.96	26.11	26.01	27.65	18.05	21.12	19.99	1.53	1.37	1.79
SpWRKY28	50.09	50.09	49.37	40.27	40.55	39.17	63.27	63.77	58.05	51.54	50.7	42.25	77.77	76.59	80.23	12.99	14.36	13.7
SpWRKY29	1.66	1.37	1.97	2.98	2.67	2.88	2.81	3.02	3.07	2.25	2.82	2.81	5.86	4.57	5.31	5.31	7.12	7.45
SpWRKY30	11.3	12.12	11.92	6.8	6.61	6.16	14.73	15.71	15.17	8.7	6.94	6.85	6.41	5.83	5.21	0.2	0.72	0.63
SpWRKY31	0.49	0.5	0.44	0.7	0.9	0.7	0.24	0.23	0.15	0.9	0.69	0.72	6.85	6.75	7.35	53.09	46.08	53.15
SpWRKY32	0.34	0.13	0.25	0.27	0.11	0.14	0.03	0	0.13	0.38	0.72	0.63	7.37	8.81	8.97	35.62	35.25	38.64
SpWRKY33	2.06	2.02	1.95	2.18	1.7	2.34	1.96	2.27	1.94	2.66	2.54	2.33	2.81	3.07	2.18	1.99	2.49	2.92
SpWRKY34	0.14	0.37	0.15	0.2	0.14	0.03	0.08	0.2	0.04	0.21	0.07	0.24	0.34	0.36	0.21	0.07	0.08	0.15
SpWRKY35	0.12	0.11	0	0.06	0.11	0.35	0.05	0	0	0.05	0.1	0.24	0.18	0.14	0.08	0	0.03	0.02
SpWRKY36	0.12	0.12	0.15	0.13	0.21	0.1	0.03	0	0	0.03	0.1	0.1	1.23	2.55	1.6	4.86	4.75	4.44
SpWRKY37	16.08	17.04	16.34	17.03	16.72	17.42	16.37	15.5	16.51	13.69	13.49	16	15.85	17.91	14.4	22.41	31.11	27.36
SpWRKY38	4.97	5.4	6.27	5.75	5.77	6.9	7.85	8.62	8.16	7.81	8.79	9.4	8.27	9.98	7.48	8.6	10.69	11.13
SpWRKY39	9.6	9.86	11.08	9.73	8.99	10.06	11.2	10.99	10.22	9.54	8.52	8.38	10.06	9.97	10.23	6.9	8.17	8.89
SpWRKY40	66.6	64.43	65.68	54.32	57.66	58.55	135.53	134.85	136.52	124.93	127.02	108.62	140.79	141.4	143.07	51.99	67.51	62.79
SpWRKY41	0	0.12	0.03	0.02	0	0	0.03	0.03	0.08	0.08	0.09	0.14	0.1	0.18	0.24	0	0	0.28
SpWRKY42	0.29	0.36	0.21	0.32	0.62	0.23	0.25	0.2	0.24	0.44	0.87	0.59	1.65	1.1	1.25	4.93	3.37	4.83
SpWRKY43	0.41	0.82	0.69	1.27	1.29	1.61	0.84	1.24	1.1	1.12	1.18	1.27	2.29	3.2	2.71	2.65	3.78	3.6
SpWRKY44	6.74	6.23	9.36	7.13	7.84	7.8	8.05	8.02	7.03	7.28	7.74	7.77	10.45	12.85	11.44	24.51	30.24	30.75
SpWRKY45	0.32	0.65	0.35	0.78	0.36	0.52	0.23	0.23	0.41	1.25	1.54	1.17	5.55	5.83	4.58	14.36	16.13	15.35
SpWRKY46	0	0	0	0	0	0.1	0	0	0	0	0	0	0.07	0	0	0	0	0
SpWRKY47	0	0.03	0	0	0	0.07	0	0	0	0	0	0	0	0	0.03	0	0	0
SpWRKY48	0.07	0.1	0.03	0	0	0	0	0	0.03	0.07	0	0	0.07	0.03	0.04	0	0.15	0.16
SpWRKY49	4.43	5.87	5.39	5.8	5.85	5.64	5.25	5.27	6.05	4.83	5.04	6.52	6.08	5.94	5.67	4.1	5.73	5.32
SpWRKY50	95.15	89.43	102.41	95.09	95.38	97.66	66.08	66.48	63.42	108.57	113.66	120.87	99.88	110.1	101.35	19.25	24.12	28.02
SpWRKY51	76.81	81.4	86.22	68.08	68.37	72.58	203.6	199.54	200.83	228.28	232.76	198.49	303.3	293.55	291.93	97.31	115.97	114.23
SpWRKY52	13.82	13.07	15.86	9.44	9.03	8.55	9.14	8.86	8.97	11.21	11.64	13.55	14.27	16.35	15.85	5.44	5.74	6.77
SpWRKY53	6.03	4.81	5.73	4.6	6.02	4.97	3.7	2.88	3.67	4.84	5.04	6.68	5.84	6.91	7.1	3.51	5.23	5.19
SpWRKY54	0.14	0.35	0.26	0.2	0.44	0.42	0.1	0.28	0.25	0.63	0.68	0.64	2.41	2.63	3.49	5.74	5.85	7.79
SpWRKY55	0	0	0	0.03	0	0	0	0	0	0.06	0.03	0	0	0.15	0.1	0.06	0.07	0.12
SpWRKY56	17.2	16.9	21.09	17.18	18.49	17.12	18.03	17.54	15.98	16.29	15.96	16.02	17.73	18.18	17.98	26.38	25.02	27.18
SpWRKY57	47.02	43.53	47.89	32.63	31.32	30.95	51.93	51.6	51.52	33.31	31.02	34.54	35.66	40.12	35.14	5.86	8.95	8.42
SpWRKY58	0.06	0.23	0.44	0.09	0.06	0.24	0.11	0.19	0.23	0.11	0.4	0.81	0.52	0.16	0.25	0.11	0.12	0
SpWRKY59	0.06	0	0	0	0	0.13	0	0	0.06	0.18	0.49	0.06	1.47	2.79	2.32	10.8	12.43	13.16
SpWRKY60	7.33	7.83	7.8	7.37	7.29	8.05	9.18	8.73	9.38	10.45	10.01	11.12	10.38	11.95	10.61	4.91	7.13	5.82
SpWRKY61	0	0.06	0	0.05	0	0.07	0.23	0.07	0	0.42	0.44	0.19	0.43	0.4	0.26	0.23	0.39	0.51
SpWRKY62	9.66	9.6	11.71	7.79	7.18	7.47	7.24	5.51	6.53	8.76	8.83	8.48	10.49	11.56	12.04	13.96	22	19.3
SpWRKY63	0.69	0.88	0.85	1.51	1.56	1.35	1.41	1.04	1.47	0.91	0.92	1.52	1.44	1.88	1.43	2.21	2.66	3.39
SpWRKY64	2.21	2.5	2.83	2.74	1.99	2.3	3.32	3.06	2.31	2.86	3.03	2.75	4.01	4.39	3.6	5.17	8.87	7.73
SpWRKY65	62.92	64.18	72.78	44.24	43.23	41.85	70.47	68.1	71.28	41.47	44.66	47.06	55.68	60.07	56.71	4.07	5.64	4.52
SpWRKY66	0.27	0.08	0.11	0.07	0.12	0.12	0.08	0.06	0	0.03	0.04	0	0.02	0	0.21	0	0	0
SpWRKY67	2.82	3.06	2.37	4.35	4.21	3.54	4.07	3.4	4.58	2.28	2.92	2.78	3.17	3.01	3.16	0.96	1.38	1.31
SpWRKY68	8.82	10.14	10.08	9.67	9.3	10.25	9.36	9.25	8.8	8.92	8.87	11.73	11.64	13.02	10.96	24.87	31.14	31.48
